# Supplementary material for: A polymer genome approach for rational design of poly(aryl ether)s with high glass transition temperature
Source: Royal Society of Chemistry journal article supplement (doi:10.1039/d3ta02479b), 2023-01-01
Supplement: d3ta02479b2.pdf [file d3ta02479b2.pdf]

## Supplementary Information

### Polymer genome approach for rational design of poly(aryl ether)s with high glass transition temperature

Ce Song<sup>a,b</sup>, Hongjian Gu<sup>b</sup>, Linyan Zhu<sup>b</sup>, Wanyuan Jiang<sup>b</sup>, Zhihuan Weng<sup>b</sup>, Lishuai Zong<sup>b</sup>, Cheng Liu<sup>b</sup>, Fangyuan Hu<sup>a,b</sup>, Yuxi Pan<sup>b,\*</sup>, and Xigao Jian<sup>a,b,\*</sup>

<sup>a</sup> *School of Materials Science and Engineering, Key Laboratory of Energy Materials and Devices (Liaoning Province), Dalian University of Technology, Dalian 116024, China*

<sup>b</sup> *State Key Laboratory of Fine Chemicals, Department of Polymer Science & Engineering, Frontiers Science Center for Smart Materials Oriented Chemical Engineering, Technology Innovation Center of High Performance Resin Materials (Liaoning Province), Dalian University of Technology, Dalian 116024, China*

\*Corresponding author.

E-mail address: panyx@dlut.edu.cn (Yuxi Pan); jian4616@dlut.edu.cn (Xigao Jian)

#### Table of content

1. Additional information for the database.
2. Details for the copolymer representation and featurization framework.
3. Supplementary information for fragment analysis.
4. Additional details and analysis for machine learning models.
5. Experimental synthesis and validation of new PAEs.

References

## 1. Additional information for the database.

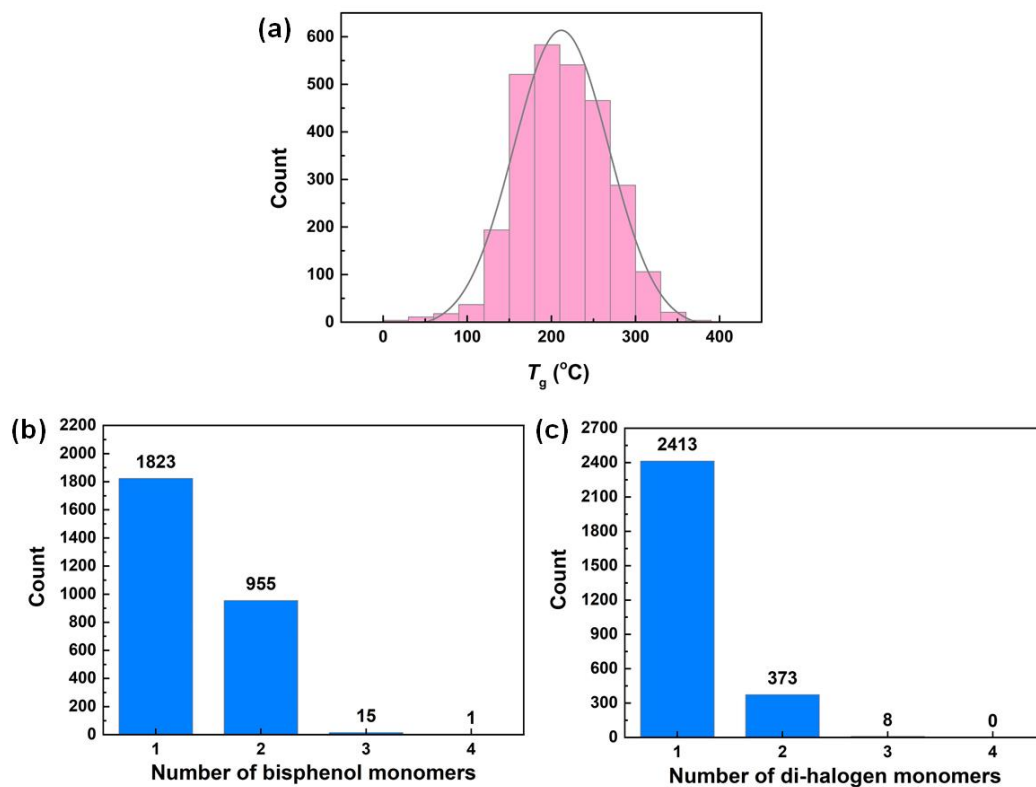

**Figure S1.** (a) Distribution of experimental  $T_g$  values for PAEs in the database established in this work. Distribution of the number of (b) bisphenol monomers and (c) di-halogen monomers contained in a single PAE in the database.

The image displays a wide variety of chemical structures, primarily focusing on different types of phenols and their derivatives. The structures are arranged in a grid-like fashion, showing a range of chemical diversity. Key features include:

- Simple Phenols:** Structures like phenol, 2,4-dihydroxyphenol, and 2,6-dihydroxyphenol.
- Substituted Phenols:** Phenols with various substituents such as halogens (Cl, Br, F, I), alkoxy groups (OCH<sub>3</sub>), amino groups (NH<sub>2</sub>), nitrile groups (CN), and carboxylic acid groups (COOH).
- Complex Polycyclic Aromatic Compounds:** Structures featuring multiple fused or linked aromatic rings, including naphthalene, anthracene, and various macrocyclic compounds.
- Functionalized Phenols:** Phenols with specific functional groups like phosphonates, phosphates, and various esters.
- Alkyl and Aryl Substituents:** Phenols with alkyl chains (C<sub>2</sub>H<sub>5</sub>, C<sub>3</sub>H<sub>7</sub>) and aryl groups (C<sub>6</sub>H<sub>5</sub>, CF<sub>3</sub>).

The structures are presented in a clear, black-and-white format, allowing for easy identification of their chemical features and potential reactivity.

(continued from the previous page)

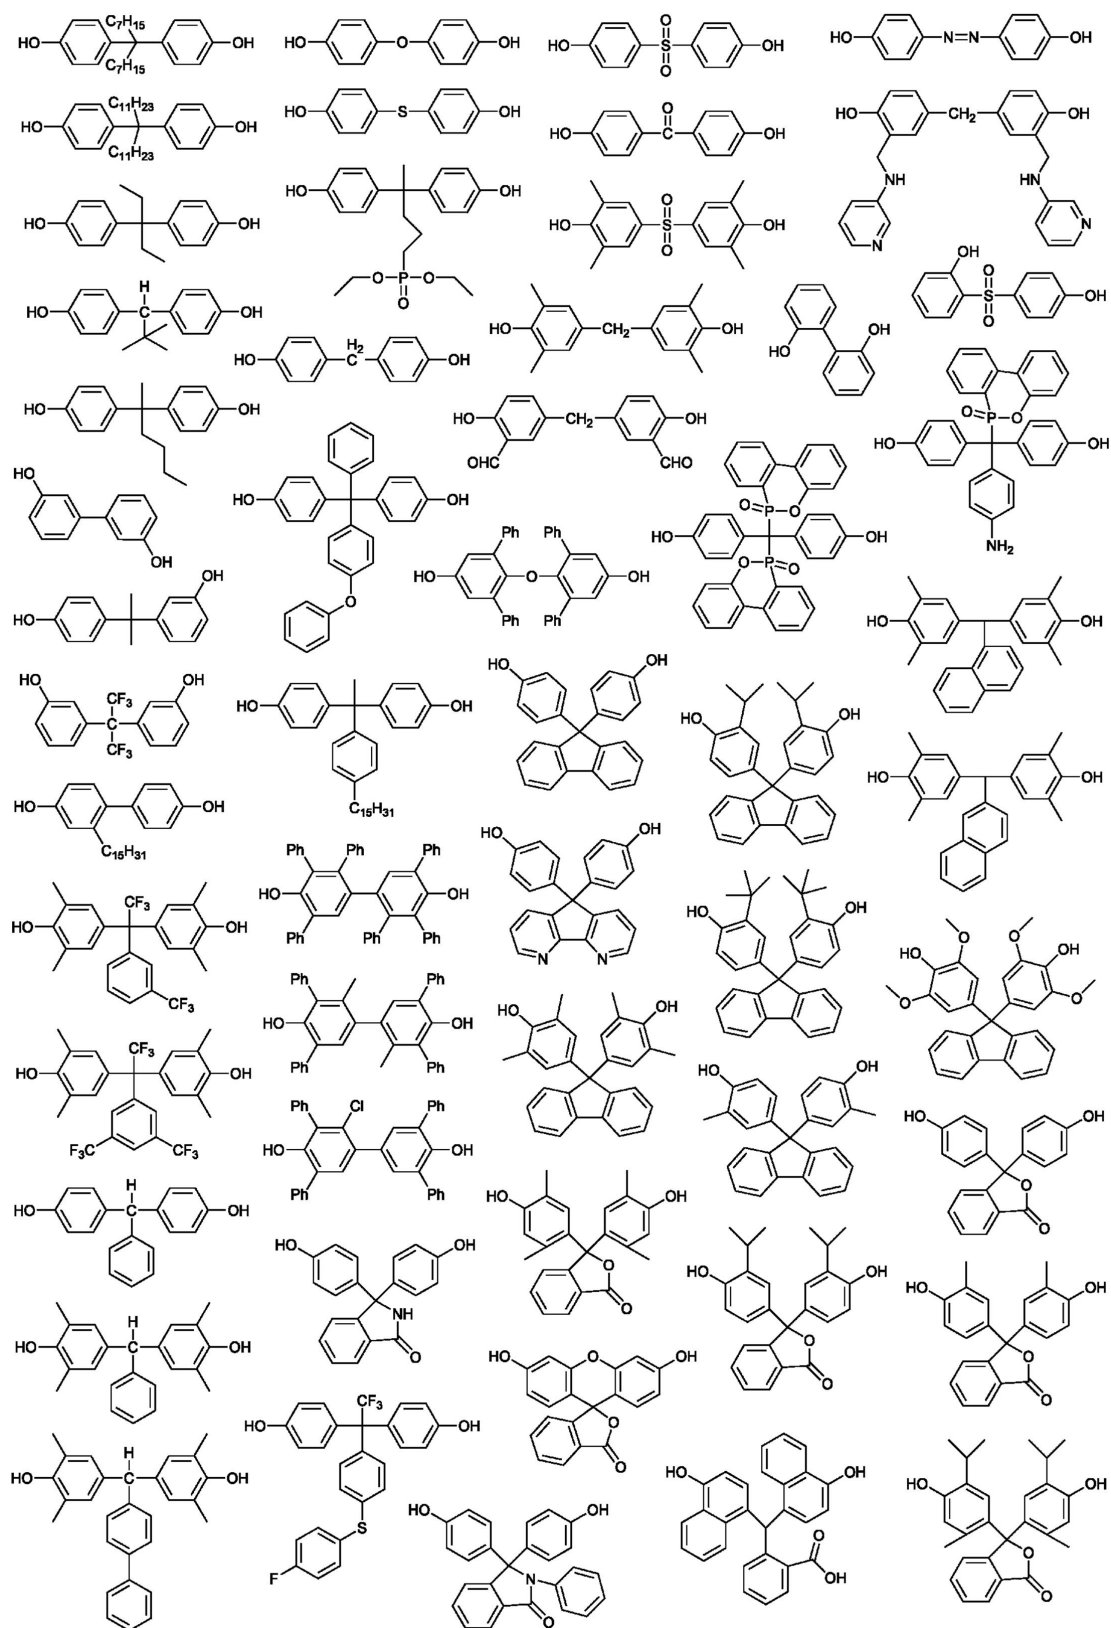

This image displays a collection of 40 chemical structures of various polyphenols, arranged in a grid-like fashion. The structures include:

- Flavonoids:** Numerous structures of flavonoids, including flavan-3-ols (catechins, epigallocatechin gallate), flavanones, flavones, and flavonols (quercetin, kaempferol, fisetin, etc.).
- Stilbenes:** Structures of stilbenes, including resveratrol and its derivatives.
- Other Polyphenols:** Structures of other polyphenolic compounds, such as phenolic acids (salicylic acid, gallic acid, ellagic acid), and various oligomeric and polymeric phenols.

The structures are drawn in a standard chemical notation, showing the carbon skeleton, oxygen atoms, and various functional groups (hydroxyl, carbonyl, ether, etc.).

(continued from the previous page)

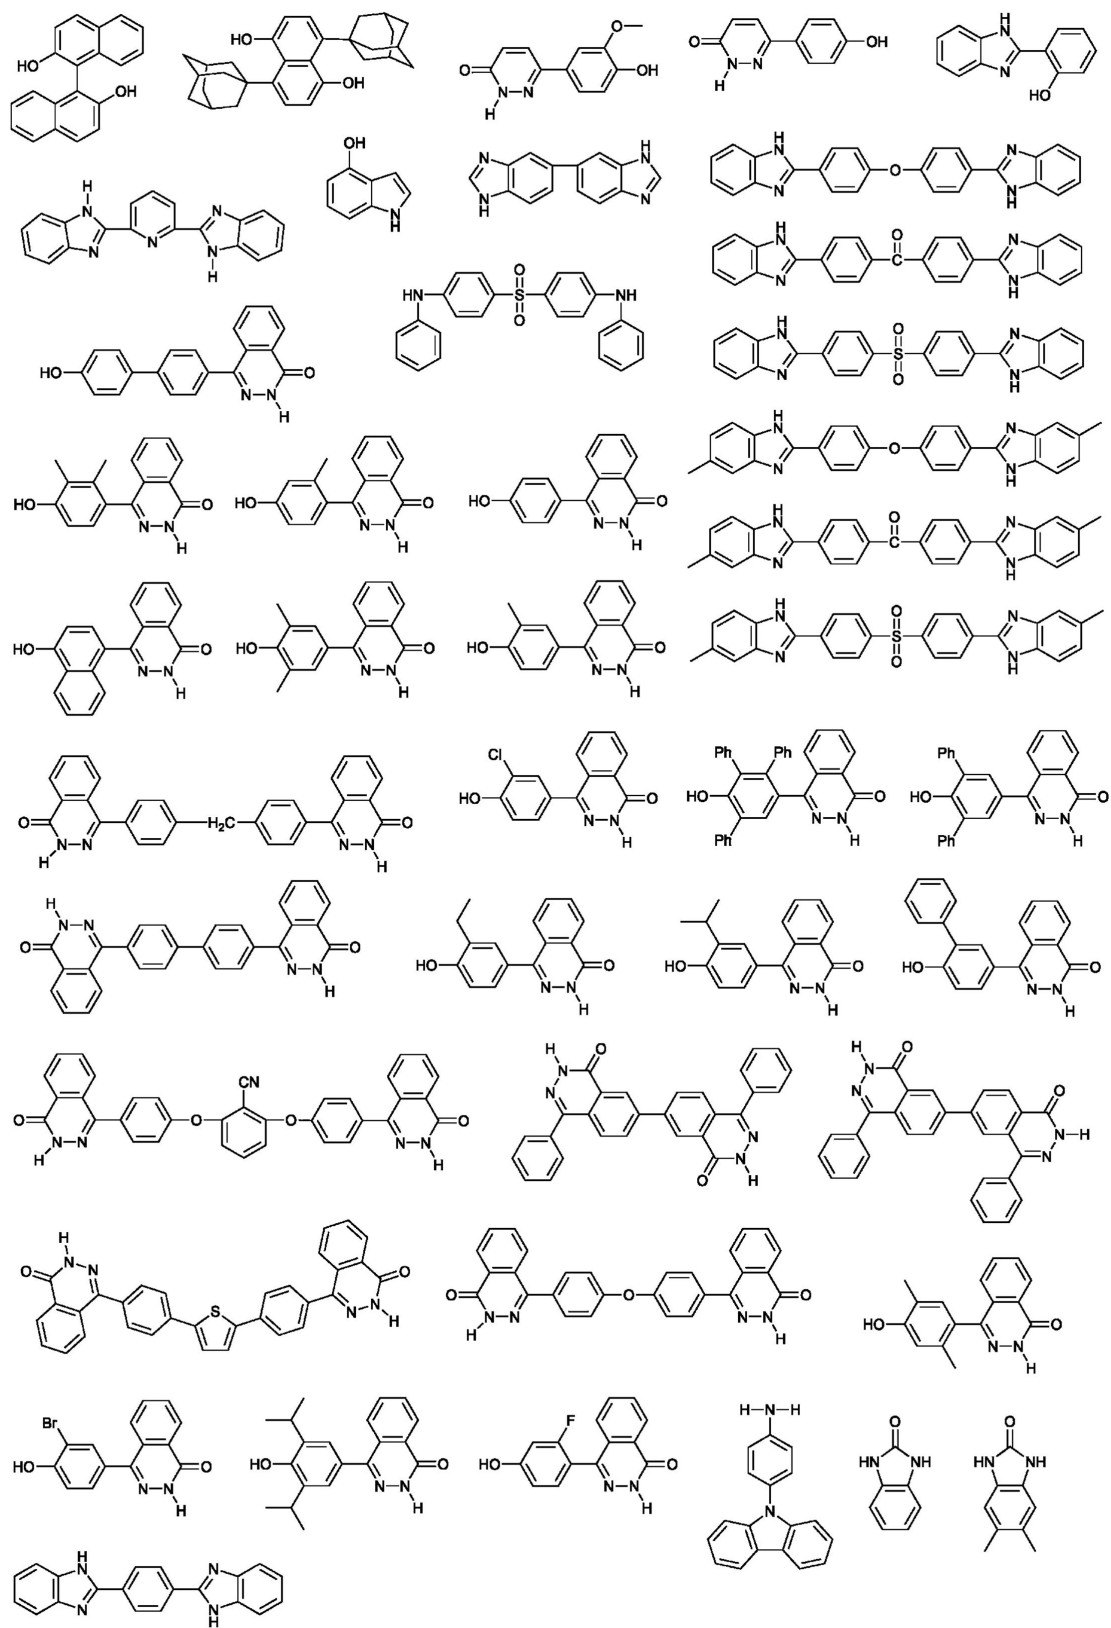

(continued from the previous page)

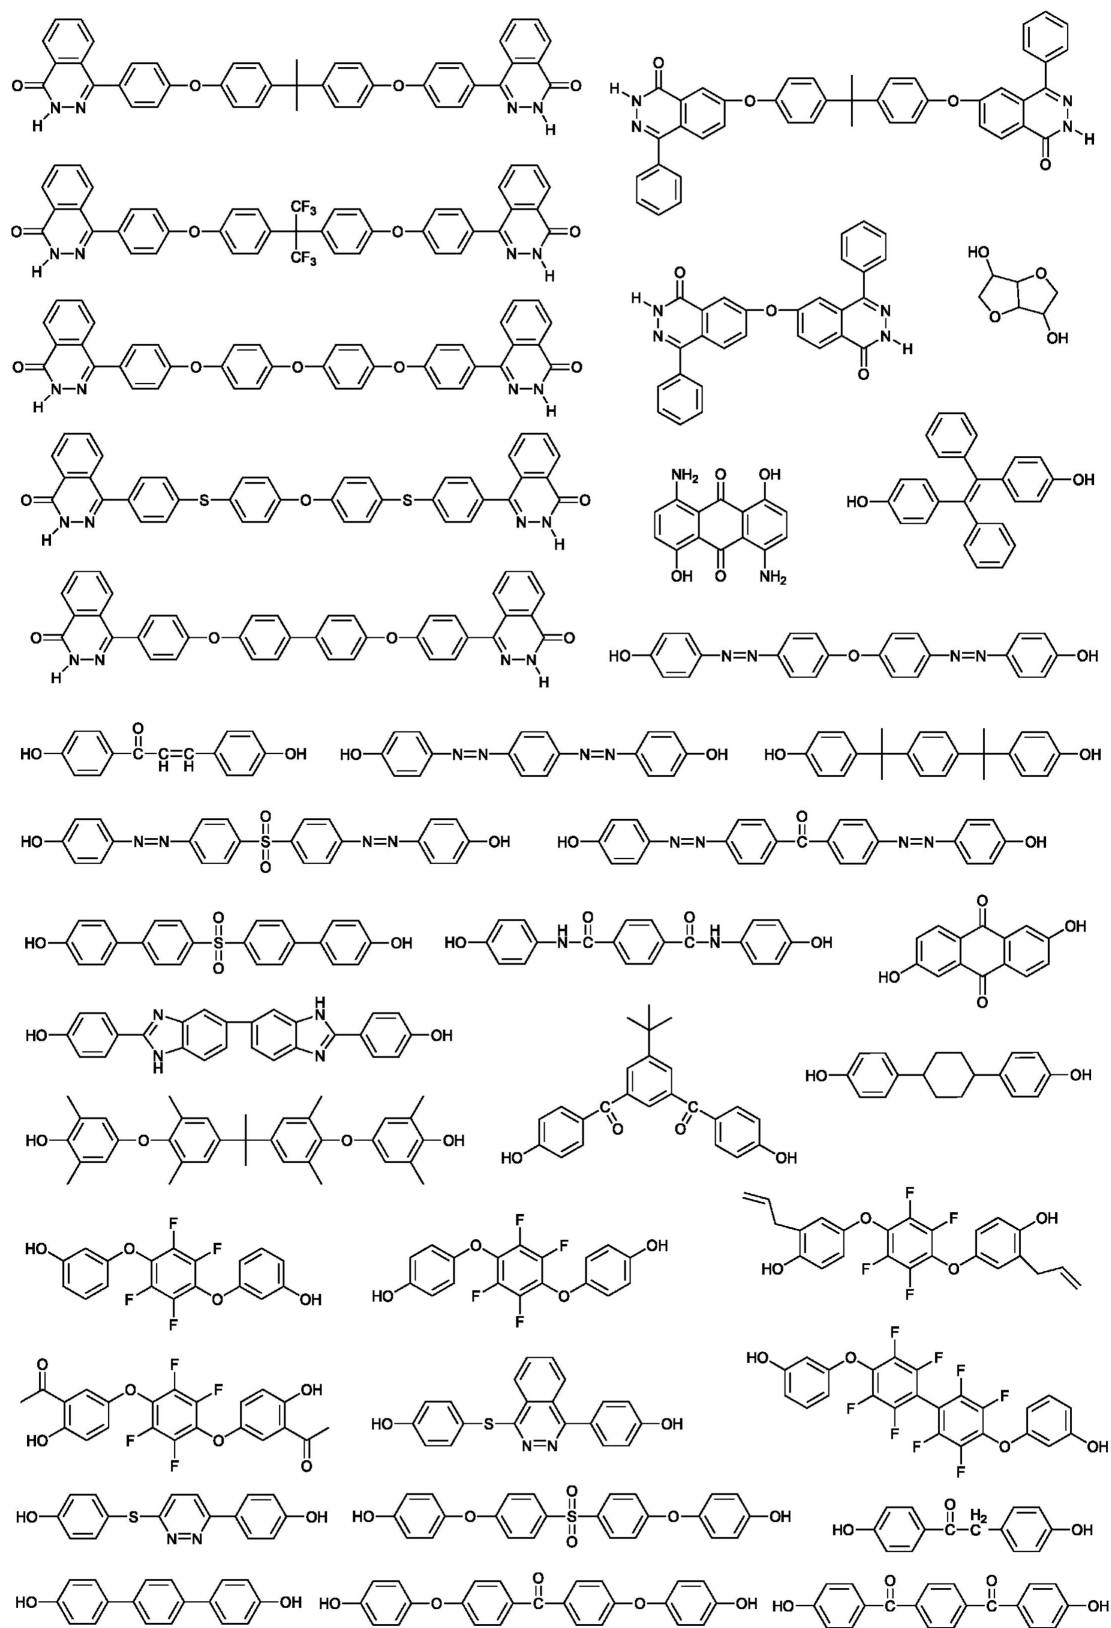

The image displays 30 chemical structures of various organic compounds, arranged in a grid-like fashion. The structures include:

- Top row:** A large polyphenol with multiple phenyl rings and hydroxyl groups; a sulfonate derivative with a long alkyl chain; a naphthalene derivative with a long alkyl chain; and a phenol derivative with a long alkyl chain.
- Second row:** A sulfonate derivative with a long alkyl chain; a naphthalene derivative with a long alkyl chain; and a phenol derivative with a long alkyl chain.
- Third row:** A sulfonate derivative with a long alkyl chain; a naphthalene derivative with a long alkyl chain; and a phenol derivative with a long alkyl chain.
- Fourth row:** A sulfonate derivative with a long alkyl chain; a naphthalene derivative with a long alkyl chain; and a phenol derivative with a long alkyl chain.
- Fifth row:** A sulfonate derivative with a long alkyl chain; a naphthalene derivative with a long alkyl chain; and a phenol derivative with a long alkyl chain.
- Sixth row:** A sulfonate derivative with a long alkyl chain; a naphthalene derivative with a long alkyl chain; and a phenol derivative with a long alkyl chain.
- Seventh row:** A sulfonate derivative with a long alkyl chain; a naphthalene derivative with a long alkyl chain; and a phenol derivative with a long alkyl chain.
- Eighth row:** A sulfonate derivative with a long alkyl chain; a naphthalene derivative with a long alkyl chain; and a phenol derivative with a long alkyl chain.
- Ninth row:** A sulfonate derivative with a long alkyl chain; a naphthalene derivative with a long alkyl chain; and a phenol derivative with a long alkyl chain.
- Tenth row:** A sulfonate derivative with a long alkyl chain; a naphthalene derivative with a long alkyl chain; and a phenol derivative with a long alkyl chain.

(continued from the previous page)

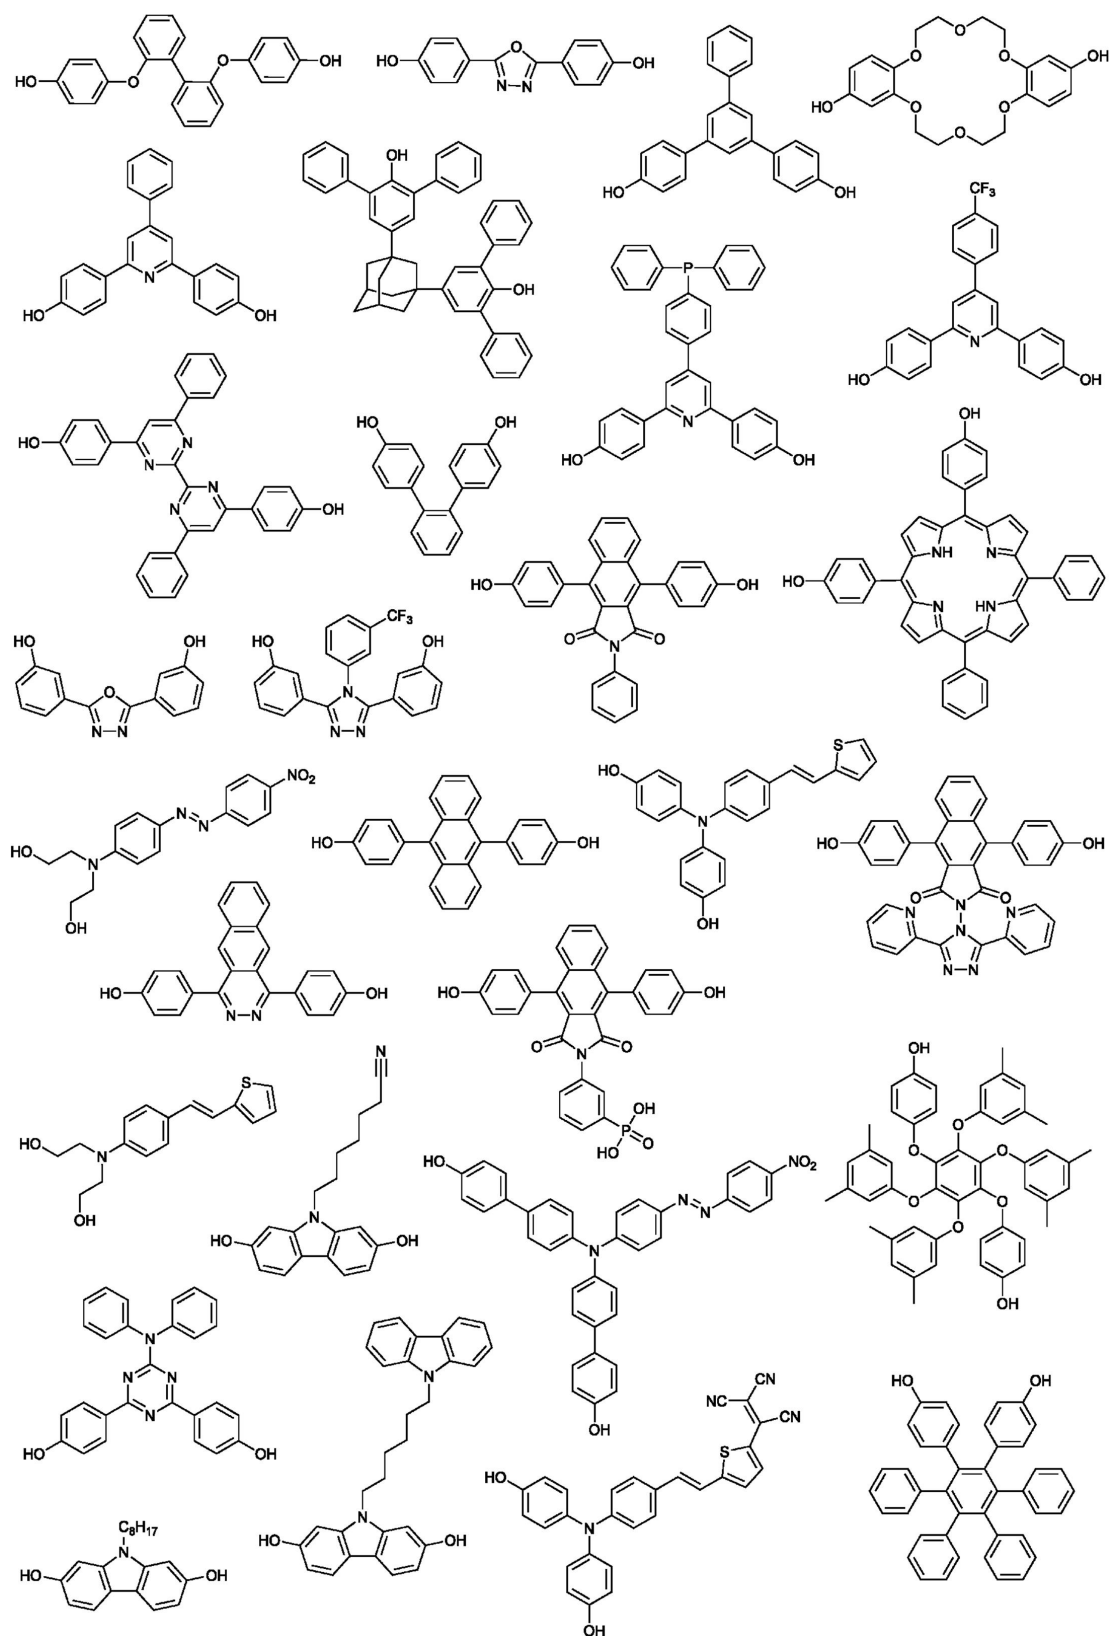

(continued from the previous page)

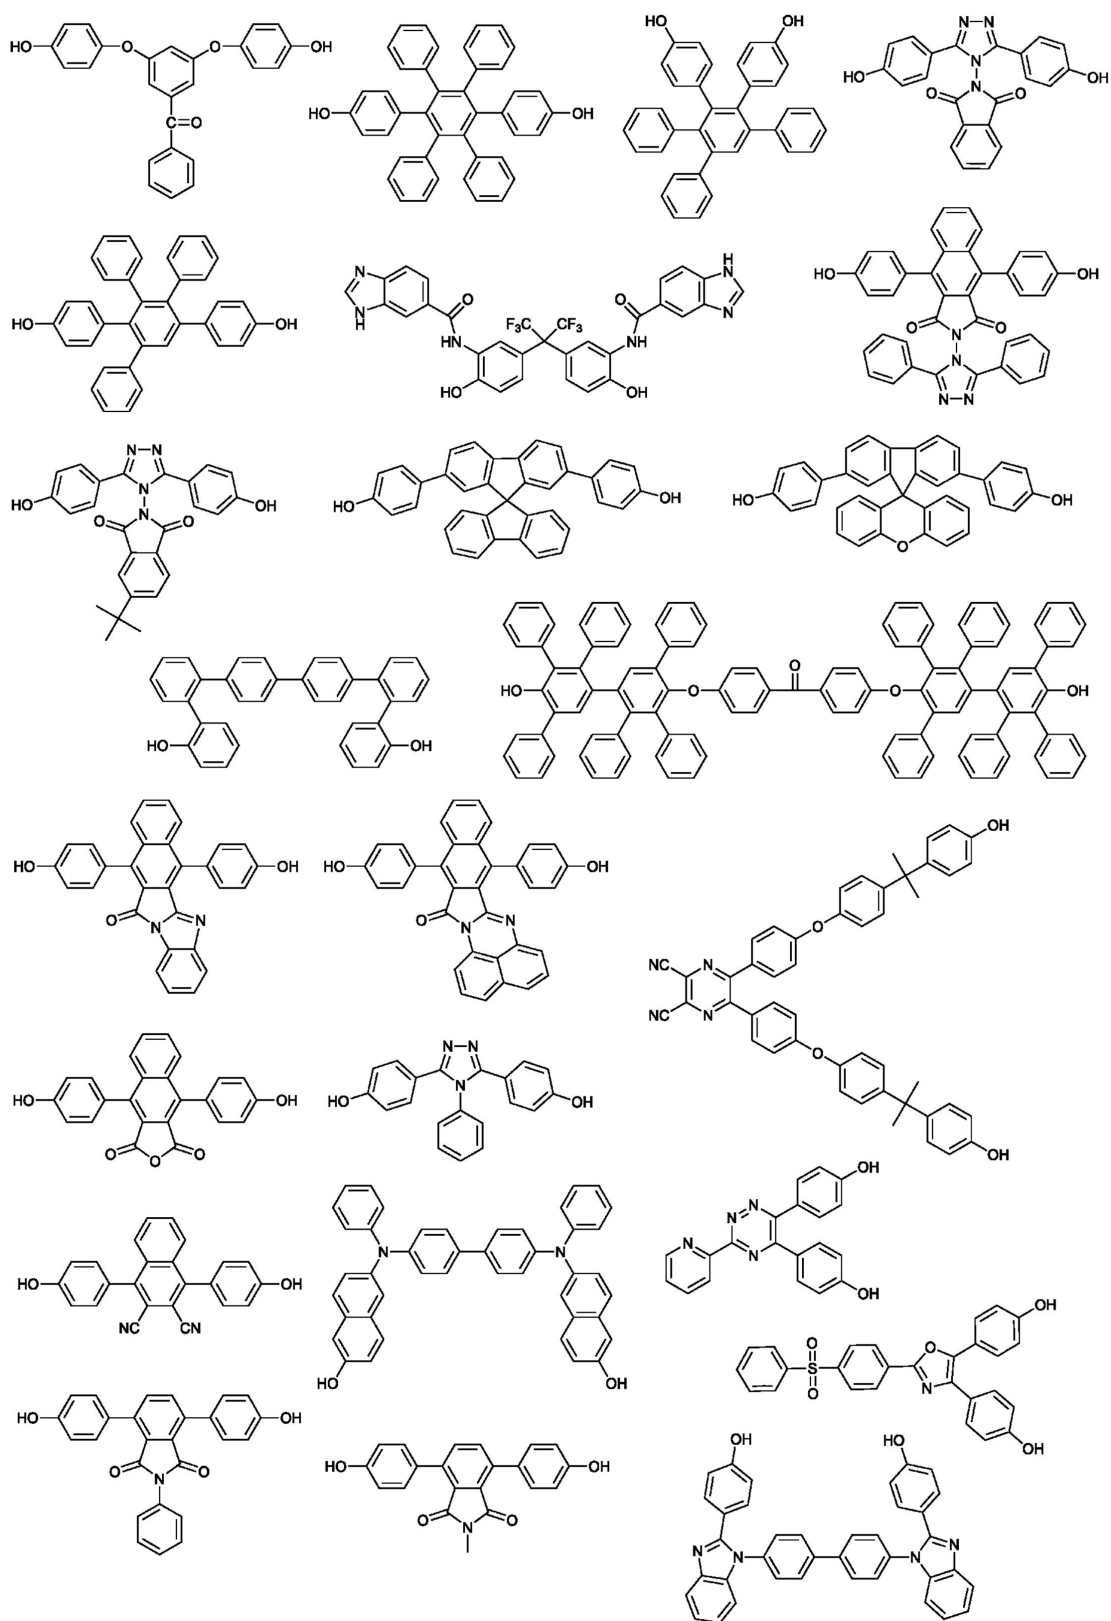

(continued from the previous page)

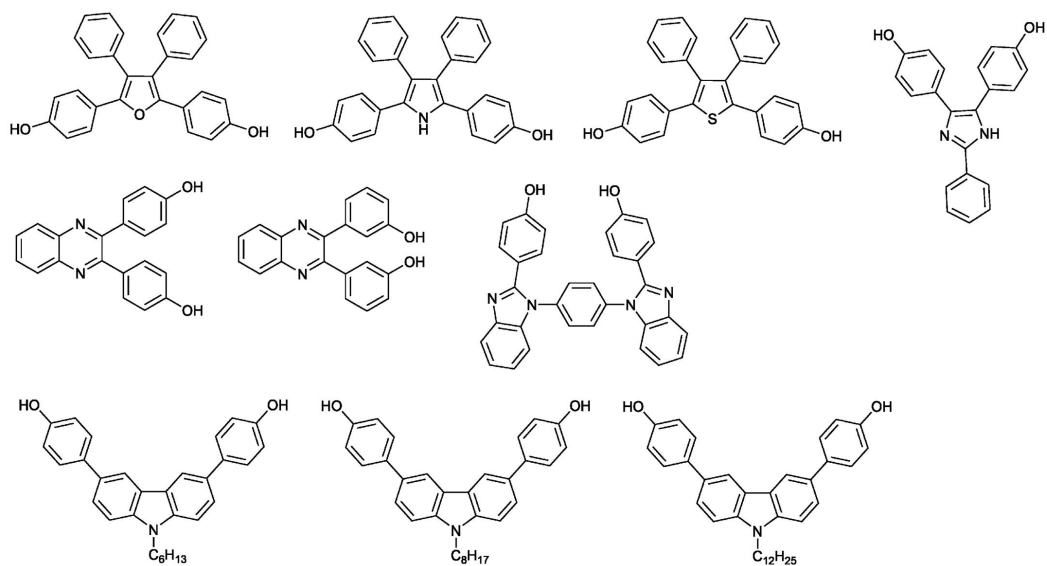

### Di-halogen monomers

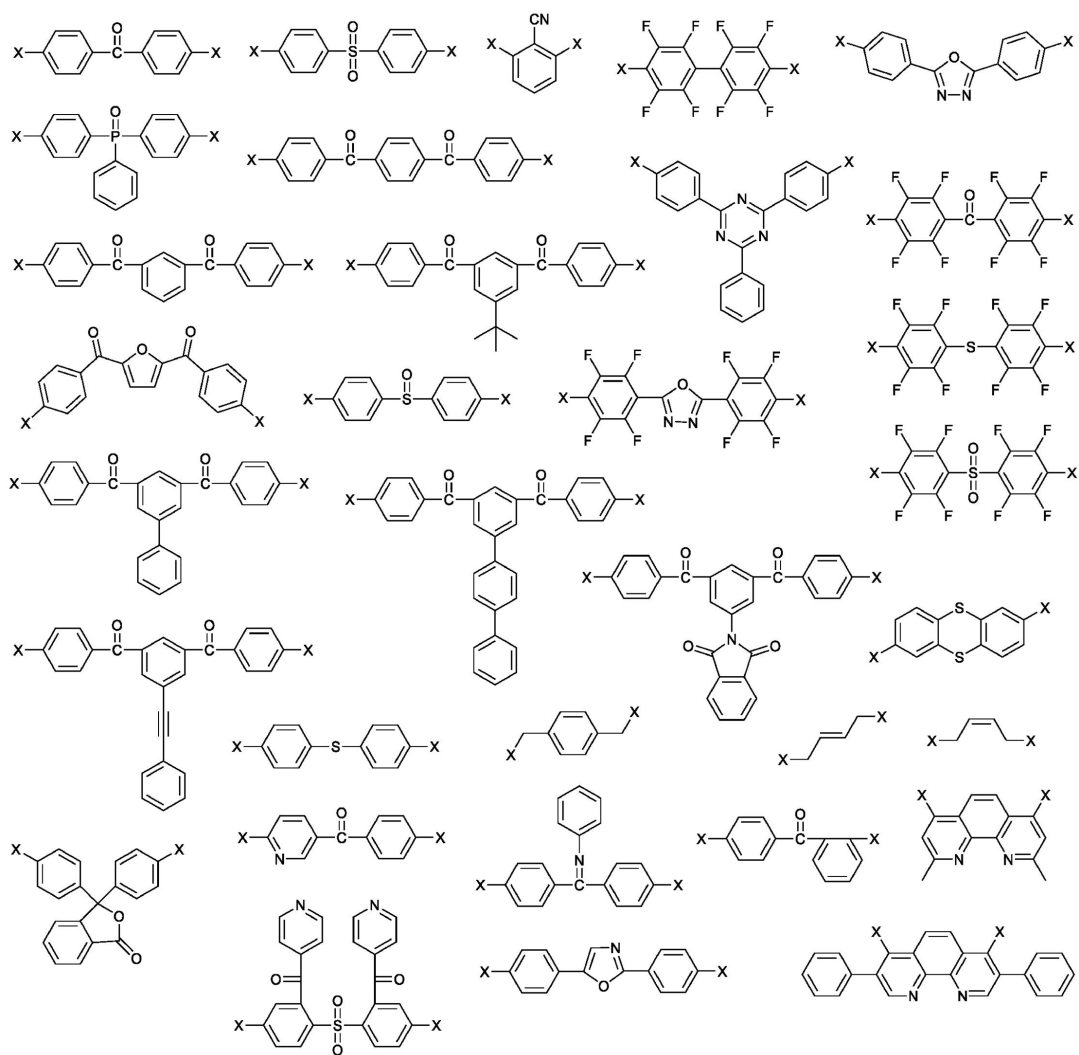

The image displays a large number of chemical structures, organized in a grid-like fashion. These structures represent various organic compounds, likely for a patent application. The structures are drawn in a standard chemical notation with lines for bonds and labels for atoms and functional groups. Many structures feature substituents labeled 'X' and 'Y', indicating variable groups. The structures include a wide variety of chemical classes, such as sulfonamides, phosphonates, ketones, aldehydes, and various heterocyclic systems (including pyridines, imidazoles, and indoles). The structures are arranged in a grid-like fashion, showing a wide variety of chemical classes.

(continued from the previous page)

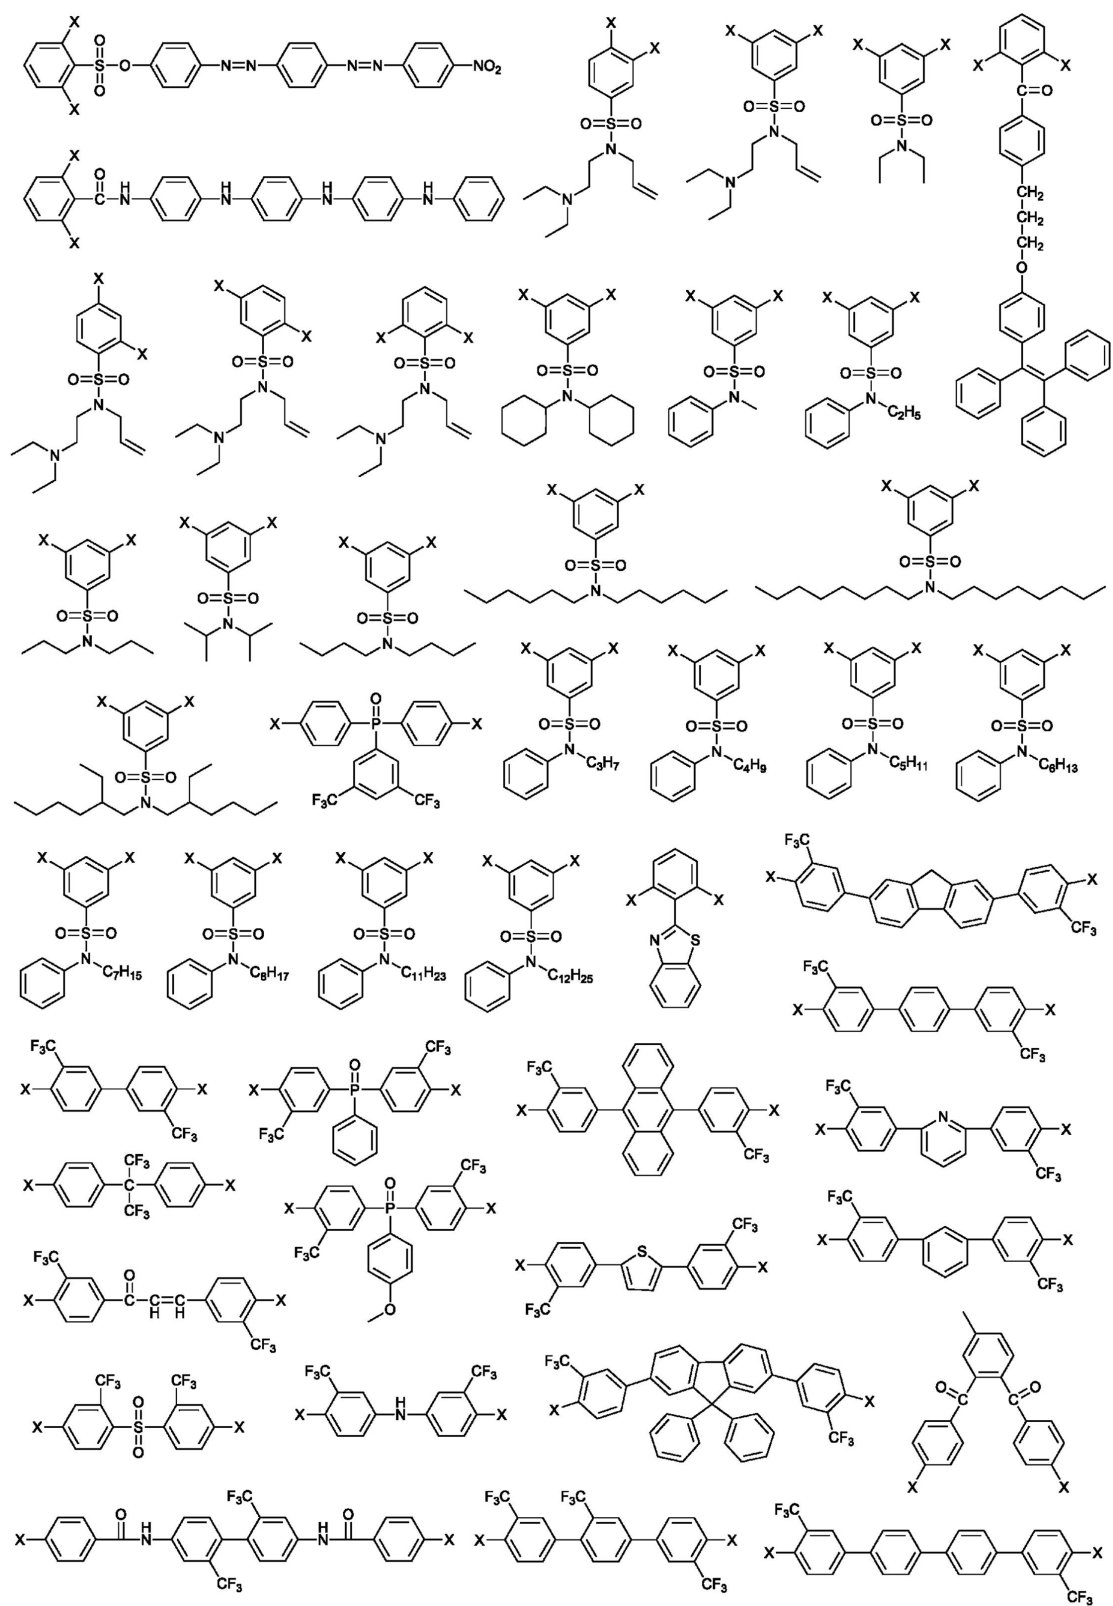

Chemical structures of 18 organic compounds, mostly aromatic, with various functional groups and substituents. The structures are arranged in a grid-like fashion, showing a variety of molecular architectures including biphenyls, terphenyls, and more complex polycyclic systems. Substituents include trifluoromethyl (CF<sub>3</sub>), trifluoromethoxy (OCF<sub>3</sub>), cyano (CN), amino (NH<sub>2</sub>), and various halogens (F, Cl, Br, I). Some structures feature complex polycyclic cores like fluorene, indole, and naphthalene derivatives.

(continued from the previous page)

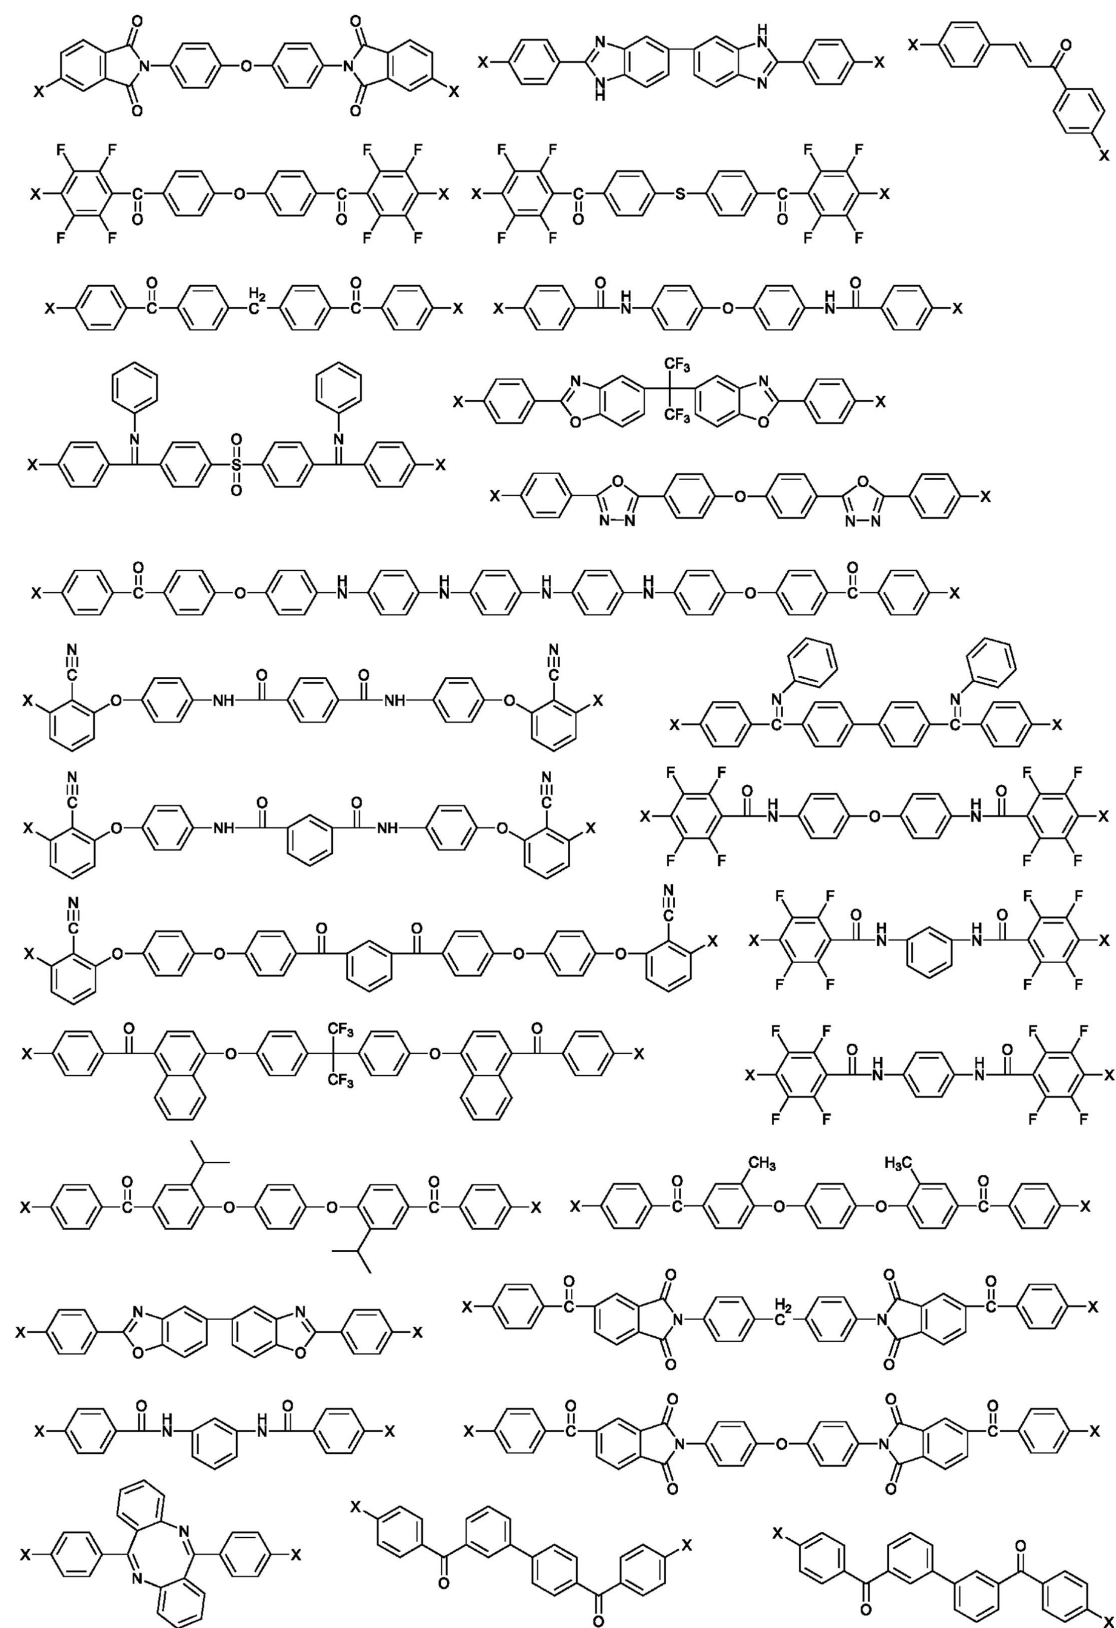



(continued from the previous page)

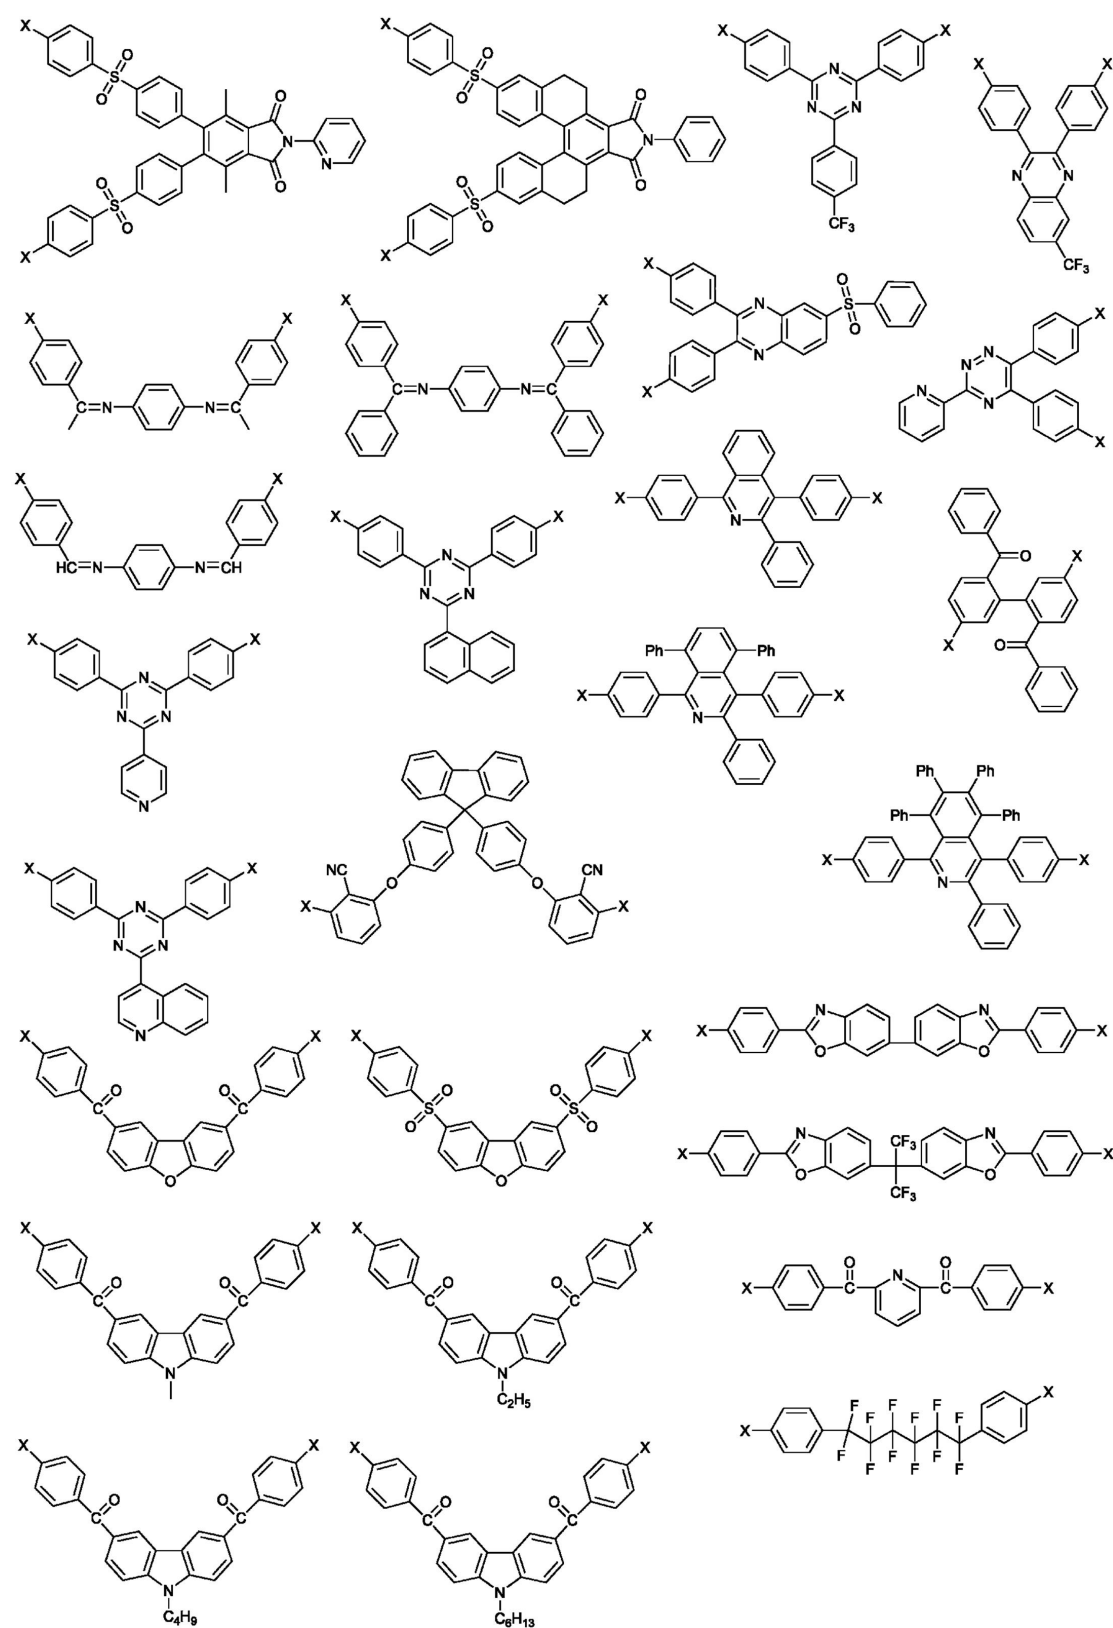

**Figure S2.** Chemical structures of bisphenol/bisphenol-like and di-halogen monomers involved in the database. “X” in the di-halogen monomer indicates F/Cl/Br element.

## 2. Details for the copolymer representation and featurization framework.

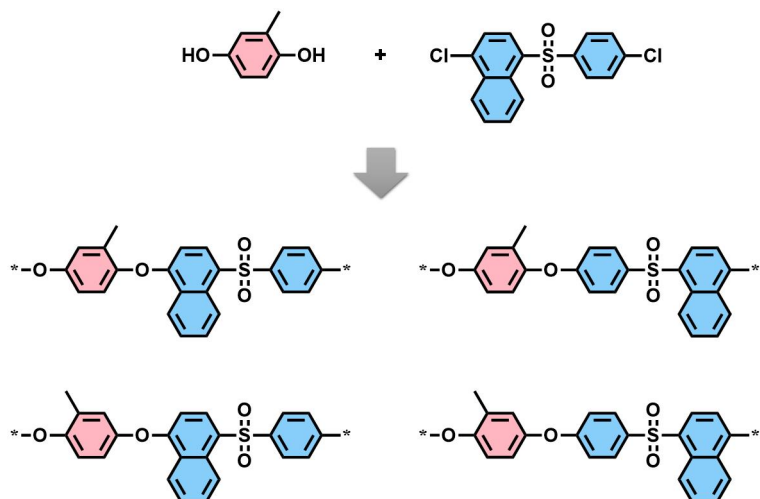

**Figure S3.** Graphical illustration of the possible structures of repeat units derived from asymmetric bisphenol and di-halogen monomers.

**Table S1.** List of function names for descriptors calculated from RDKit. Names of 3D descriptors are in bold font.

|                     |                    |                          |                            |
|---------------------|--------------------|--------------------------|----------------------------|
| MaxEStateIndex      | MinEStateIndex     | MaxAbsEStateIndex        | MinAbsEStateIndex          |
| qed                 | MolWt              | HeavyAtomMolWt           | FpDensityMorgan1           |
| BalabanJ            | ExactMolWt         | MaxPartialCharge         | FpDensityMorgan2           |
| BertzCT             | Chi1n              | MinPartialCharge         | FpDensityMorgan3           |
| Chi0                | Chi3n              | MaxAbsPartialCharge      | NumRadicalElectrons        |
| Chi0n               | Chi0v              | Chi1                     | MinAbsPartialCharge        |
| Chi1v               | Chi2n              | Chi2v                    | NumValenceElectrons        |
| Chi3v               | Chi4n              | Chi4v                    | HallKierAlpha              |
| Ipc                 | Kappa1             | Kappa2                   | Kappa3                     |
| LabuteASA           | PEOE_VSA1          | PEOE_VSA10               | PEOE_VSA11                 |
| PEOE_VSA12          | PEOE_VSA13         | PEOE_VSA14               | PEOE_VSA2                  |
| PEOE_VSA3           | PEOE_VSA4          | PEOE_VSA5                | PEOE_VSA6                  |
| PEOE_VSA7           | PEOE_VSA8          | PEOE_VSA9                | SMR_VSA1                   |
| SMR_VSA10           | SMR_VSA2           | SMR_VSA3                 | SMR_VSA4                   |
| SMR_VSA5            | SMR_VSA6           | SMR_VSA7                 | SMR_VSA8                   |
| SMR_VSA9            | SlogP_VSA1         | SlogP_VSA10              | SlogP_VSA11                |
| SlogP_VSA12         | SlogP_VSA2         | SlogP_VSA3               | SlogP_VSA4                 |
| SlogP_VSA5          | SlogP_VSA6         | SlogP_VSA7               | SlogP_VSA8                 |
| SlogP_VSA9          | TPSA               | EState_VSA1              | EState_VSA10               |
| EState_VSA11        | EState_VSA2        | EState_VSA3              | EState_VSA4                |
| EState_VSA5         | EState_VSA6        | EState_VSA7              | EState_VSA8                |
| EState_VSA9         | VSA_EState1        | VSA_EState10             | VSA_EState2                |
| VSA_EState3         | VSA_EState4        | VSA_EState5              | VSA_EState6                |
| VSA_EState7         | VSA_EState8        | VSA_EState9              | NumAliphaticRings          |
| FractionCSP3        | NOCOUNT            | NumAliphaticHeterocycles | NumAliphaticCarbocycles    |
| NHOHCount           | HeavyAtomCount     | NumAromaticCarbocycles   | NumAromaticHeterocycles    |
| MolLogP             | NumHAcceptors      | NumSaturatedCarbocycles  | NumSaturatedHeterocycles   |
| MolMR               | NumHDonors         | NumHeteroatoms           | NumSaturatedRings          |
| RingCount           | fr Al COO          | NumRotatableBonds        | NumAromaticRings           |
| fr Al OH            | fr ArN             | fr Al OH noTert          | fr Ar COO                  |
| fr Ar N             | fr Ar NH           | fr Ar OH                 | fr COO                     |
| fr COO2             | fr C O             | fr C O noCOO             | fr C S                     |
| fr HOCCN            | fr Imine           | fr NH0                   | fr NH1                     |
| fr NH2              | fr N O             | fr Ndealkylation1        | fr Ndealkylation2          |
| fr Npyrrole         | fr SH              | fr aldehyde              | fr alkyl carbamate         |
| fr alkyl halide     | fr allylic oxid    | fr amide                 | fr amidine                 |
| fr aniline          | fr aryl methyl     | fr azide                 | fr azo                     |
| fr barbitur         | fr benzene         | fr benzodiazepine        | fr bicyclic                |
| fr diazo            | fr epoxide         | fr dihydropyridine       | fr ester                   |
| fr ether            | fr furan           | fr guanido               | fr halogen                 |
| fr hdrzine          | fr hdrzone         | fr imidazole             | fr imide                   |
| fr isocyan          | fr isothiocyan     | fr ketone                | fr ketone Topliss          |
| fr lactam           | fr lactone         | fr methoxy               | fr morpholine              |
| fr nitrile          | fr nitro           | fr nitro arom            | fr nitro arom nonortho     |
| fr nitroso          | fr oxazole         | fr oxime                 | fr para hydroxylation      |
| fr phenol           | fr phos acid       | fr phenol noOrthoHbond   | fr phos ester              |
| fr piperdine        | fr piperzine       | fr priamide              | fr prisulfonamd            |
| fr pyridine         | fr quatN           | fr term acetylene        | fr sulfonamd               |
| fr sulfone          | fr sulfide         | fr tetrazole             | fr thiazole                |
| fr thiocyan         | fr thiophene       | fr unbrcH alkane         | fr urea                    |
| <b>PBF</b>          | <b>PMI1</b>        | <b>PMI2</b>              | <b>PMI3</b>                |
| <b>NPR1</b>         | <b>NPR2</b>        | <b>RadiusOfGyration</b>  | <b>InertialShapeFactor</b> |
| <b>Eccentricity</b> | <b>Asphericity</b> | <b>SphericityIndex</b>   |                            |

**Table S2.** Parameter settings for the RF model during the RFECV process.

| Parameter         | Setting         |
|-------------------|-----------------|
| n_estimators      | 90              |
| criterion         | 'squared_error' |
| max_depth         | 10              |
| min_samples_split | 2               |
| min_samples_leaf  | 1               |

### 3. Supplementary information for fragment analysis.

The Z-score ( $Z_i$ ) of each fragment  $i$  was calculated by

$$Z_i = \frac{k_i - m \frac{K_i}{M}}{\sigma_i}$$

with

$$\sigma_i = \sqrt{\frac{mK_i(M - K_i)(M - m)}{M^2(M - 1)}}$$

where  $M$  is the total number of PAE copolymers in the database,  $m$  represents the number of polymers whose  $T_g$  are higher than 250 °C in the database,  $K_i$  is the number of occurrences of fragment  $i$  in  $M$  polymers, and  $k_i$  is the occurrence of fragment  $i$  in  $m$  polymers.

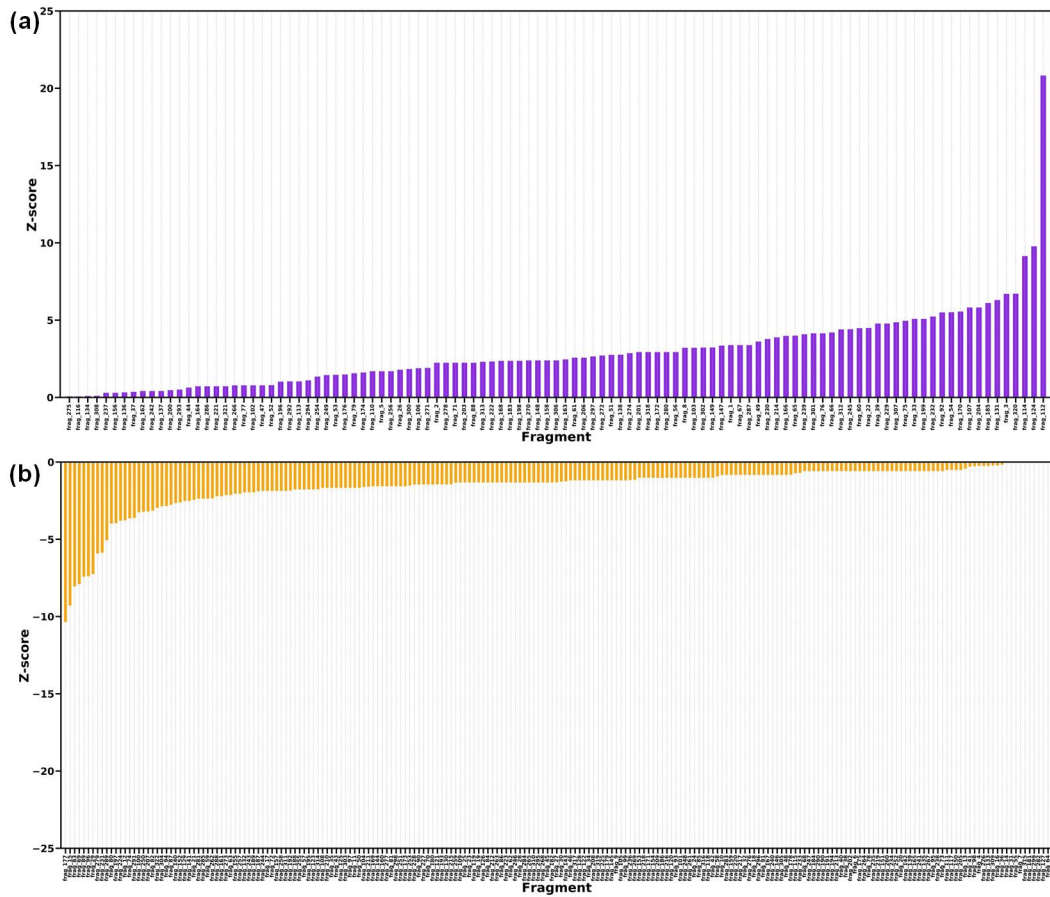

**Figure S4.** (a) Positive and (b) negative Z-scores of the 322 constituting fragments in the subset of PAEs with  $T_g$  higher than 250 °C.

## 4. Additional details and analysis for machine learning models.

**Table S3.** List of the selected descriptors used as inputs for Model\_1.

| Descriptor name                                                | Description                                                                                                                                                      |
|----------------------------------------------------------------|------------------------------------------------------------------------------------------------------------------------------------------------------------------|
| MaxEStateIndex                                                 | Maximum EState index from J. Chem. Inf. Comput. Sci., vol 31, 76-82 (1991).                                                                                      |
| MinEStateIndex                                                 | Minimum EState index from J. Chem. Inf. Comput. Sci., vol 31, 76-82 (1991).                                                                                      |
| MinAbsEStateIndex                                              | Minimum absolute EState index from J. Chem. Inf. Comput. Sci., vol 31, 76-82 (1991).                                                                             |
| qed                                                            | Quantitative estimate of drug-likeness from Nat. Chem., vol 4, 90-98 (2012).                                                                                     |
| MaxAbsPartialCharge                                            | Maximum absolute partial Gasteiger atomic charge of the molecule.                                                                                                |
| FpDensityMorgan1                                               | Morgan fingerprint, radius 1                                                                                                                                     |
| BalabanJ                                                       | A chemical distance-based topological index from Chem. Phys. Lett. vol 89, 399-404 (1982).                                                                       |
| Chi4v                                                          | A valence molecular connectivity index calculated from equations (5), (15) and (16) of Rev. Comp. Chem., vol 2, 367-422 (1991).                                  |
| Chi4n                                                          | Similar to Hall Kier Chi4v, but uses nVal instead of valence.                                                                                                    |
| Kappa3                                                         | Third-order shape/connectivity index from Rev. Comp. Chem. vol 2, 367-422 (1991).                                                                                |
| PEOE_VSAN, N = 1, 3, 6, 7, 8, 9, 13                            | Molecular operating environment (MOE)-type descriptors using partial charges and surface area contributions from J. Mol. Graph. Model., Vol 18, 464-477 (2000).  |
| SMR_VSAN, N = 1, 6, 9, 10                                      | MOE-type descriptors using molar refractivity contributions and surface area contributions from J. Mol. Graph. Model., Vol 18, 464-477 (2000).                   |
| SlogP_VSAN, N = 4, 5, 8, 11                                    | MOE-type descriptors using LogP contributions and surface area contributions from J. Mol. Graph. Model., Vol 18, 464-477 (2000).                                 |
| TPSA                                                           | Sum of topological surface area of polar atoms in the molecule from J. Med. Chem., vol 43, 3714-7 (2000).                                                        |
| EState_VSAN, N = 9, 10<br>VSA_EStateN, N = 2, 3, 4, 5, 7, 8, 9 | MOE-type descriptors using electrotopological state indices and surface area contributions from J. Chem. Inform. Comput. Sci., vol 31, 76-81 (1991).             |
| FractionCSP3                                                   | Fraction of $sp^3$ hybridized carbon atoms.                                                                                                                      |
| NumAliphaticRings                                              | Number of aliphatic (containing at least one non-aromatic bond) rings.                                                                                           |
| NumRotatableBonds                                              | Number of rotatable bonds.                                                                                                                                       |
| fr_bicyclic                                                    | Number of bicyclic rings.                                                                                                                                        |
| fr_ketone                                                      | Number of ketones.                                                                                                                                               |
| fr_para_hydroxylation                                          | Number of para-hydroxylation sites.                                                                                                                              |
| fr_sulfone                                                     | Number of sulfone groups.                                                                                                                                        |
| NPR2                                                           | Normalized principal moments ratio 2 ( $=I_2/I_3$ ) from J. Chem. Inf. Comput. Sci., Vol. 43, 987-1003 (2003).                                                   |
| RadiusOfGyration                                               | Radius of gyration from handbook of Chemoinformatics ( <a href="https://doi.org/10.1002/9783527618279.ch37">https://doi.org/10.1002/9783527618279.ch37</a> )     |
| Eccentricity                                                   | Molecular eccentricity from handbook of chemoinformatics ( <a href="https://doi.org/10.1002/9783527618279.ch37">https://doi.org/10.1002/9783527618279.ch37</a> ) |
| SphericityIndex                                                | Sphericity index from handbook of chemoinformatics ( <a href="https://doi.org/10.1002/9783527618279.ch37">https://doi.org/10.1002/9783527618279.ch37</a> )       |

**Table S4.** Parameter settings for the SVR predictive model.

| Parameter | Setting |
|-----------|---------|
| kernel    | 'rbf'   |
| C         | 200     |
| epsilon   | 0.1     |
| gamma     | 'scale' |
| tol       | 0.001   |

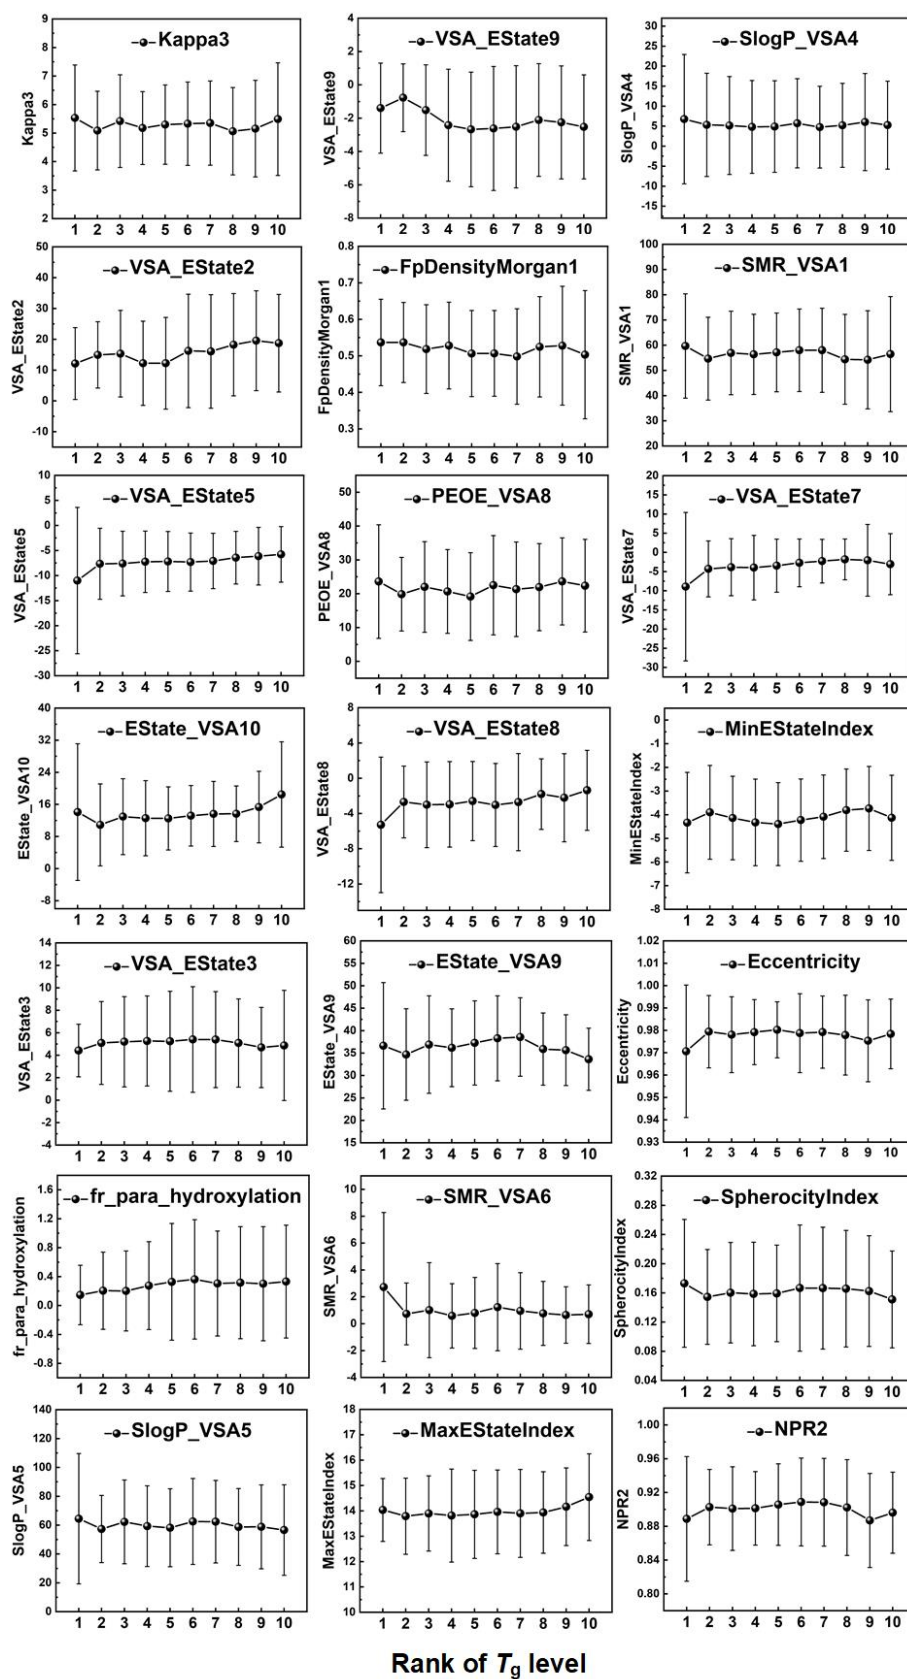

**Figure S5.** Average values with standard deviations of the selected descriptors in 10 subgroups of increasing  $T_g$  levels. The smaller number of the x-axis indicates the lower  $T_g$  level.

## 5. Experimental synthesis and validation of new PAEs.

**Materials.** 4-(4-hydroxyphenyl)phthalazin-1(2*H*)-one (DHPZ) was supplied by Dalian Polymer New Materials Co., Ltd. (Dalian, China). 4,4'-(9*H*-fluorene-9,9-diyl)diphenol (BHPF) was purchased from Wuhan Jiakailong Co. Ltd., 2,6-difluorobenzonitrile (DFBN) and 4,4'-sulfonylbis(chlorobenzene) (DCS) were obtained from Macklin Co. Ltd., and DHPZ, BHPF, DFBN, and DCS were used without further purification.

**Monomer Synthesis.** Monomer TBPZ was synthesized according to the synthetic route illustrated in Figure S6. Firstly, 0.33 mol of phthalic anhydride, 0.825 mol of anhydrous aluminum chloride, and 250 mL of 1,2-dichloroethane were added in a 500 mL three-neck flask. Subsequently, 0.15 mol of diphenyl sulfide was added slowly at 0 °C. The reaction was heated to 50 °C and held at this temperature for 6 h. The mixture was poured onto 500 g of crushed ice containing 15 mL of HCl. The 1,2-dichloroethane was evaporated and the 4,4'-bis(2-carboxybenzoyl)diphenyl sulfide was filtered and dried. Secondly, 0.2 mol of hydrazine monohydrate was added into 0.1 mol of 4,4'-bis(2-carboxybenzoyl)diphenyl sulfide and 500 mL of ethanol. The reaction mixture was heated to reflux and stirred for 6 h. A white powder precipitated, which was washed with ethanol and dried at 80 °C. A total of 44.1 g of TBPZ was obtained as a white powder.

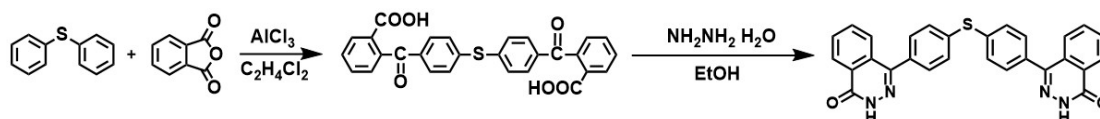

**Figure S6.** Synthetic route of monomer TBPZ.

**Polymer Synthesis.** PPFES, PPFEN, and PPFENS were synthesized by high temperature solution nucleophilic substitution of DHPZ and BHPF with DCS and DFBN. The detailed feed ratios of these monomers are presented in the following Table S5. PBPS was synthesized by high temperature solution nucleophilic substitution of TBPZ with DCS. Detailed synthesis process can refer to the literatures [1]. No unexpected or unusually high safety hazards were encountered.

**Table S5.** Feed ratios of monomers for preparations of PPFES, PPFEN, and PPFENS.

| PAEs   | DHPZ <sup>a</sup><br>(mol%) | BHPF <sup>b</sup><br>(mol%) | DCS <sup>c</sup><br>(mol%) | DFBN <sup>d</sup><br>(mol%) |
|--------|-----------------------------|-----------------------------|----------------------------|-----------------------------|
| PPFES  | 50                          | 50                          | 100                        | 0                           |
| PPFEN  | 50                          | 50                          | 0                          | 100                         |
| PPFENS | 50                          | 50                          | 50                         | 50                          |

<sup>a</sup> Feed molar ratio of DHPZ relative to the total bisphenols.

<sup>b</sup> Feed molar ratio of BHPF relative to the total bisphenols.

<sup>c</sup> Feed molar ratio of DCS relative to the total di-halogens.

<sup>d</sup> Feed molar ratio of DFBN relative to the total di-halogens.

**Structural Characterization.** The  $^1\text{H}$ -NMR and Fourier transform infrared (FT-IR) techniques were conducted to characterize chemical structures of PPFES, PPFEN, PPFENS, and PBPS. The  $^1\text{H}$ -NMR spectra of these PAEs were recorded on a Bruker Vaian DLG400 spectrometer. Samples were composed of a solution of 5–10 mg of each compound in 0.5 ml of deuterated chloroform using tetramethyl silane (TMS) as the internal standard at room temperature. The  $^1\text{H}$ -NMR spectra of synthesized samples are shown in the following Figure S7. FT-IR measurements were conducted with a Thermo Nicolet IS50 FT-IR spectrometer. Figure S8 plots the FT-IR spectra of PPFES, PPFEN, PPFENS, and PBPS.

**Thermal Property Characterization.** Glass transition temperatures ( $T_g$ ) were performed with a METTLER DSC instrument under  $50\text{ ml min}^{-1}$  nitrogen flows at  $10\text{ }^\circ\text{C min}^{-1}$  ramping rate. After the first heating and quenching,  $30\text{ }^\circ\text{C}$ - $400\text{ }^\circ\text{C}$ - $30\text{ }^\circ\text{C}$ - $400\text{ }^\circ\text{C}$ , the  $T_g$  data were selected from the second scan.

**Table S6.** Experimentally measured  $T_g$  obtained via DSC tests compared with the predicted results from the SVR model.

| PAEs   | Predicted $T_g$ ( $^\circ\text{C}$ ) <sup>a</sup> | Experimental $T_g$ ( $^\circ\text{C}$ ) |
|--------|---------------------------------------------------|-----------------------------------------|
| PPFES  | 282                                               | 288                                     |
| PPFEN  | 283                                               | 289                                     |
| PPFENS | 290                                               | 292                                     |
| PBPS   | 323                                               | 328                                     |

<sup>a</sup> Predictions on new PAEs were performed by the Model\_1 with the highest predictive performance (i.e., the lowest RMSE and the highest  $R^2$ , as shown in Fig. 4 in the manuscript) among the ten SVR models.

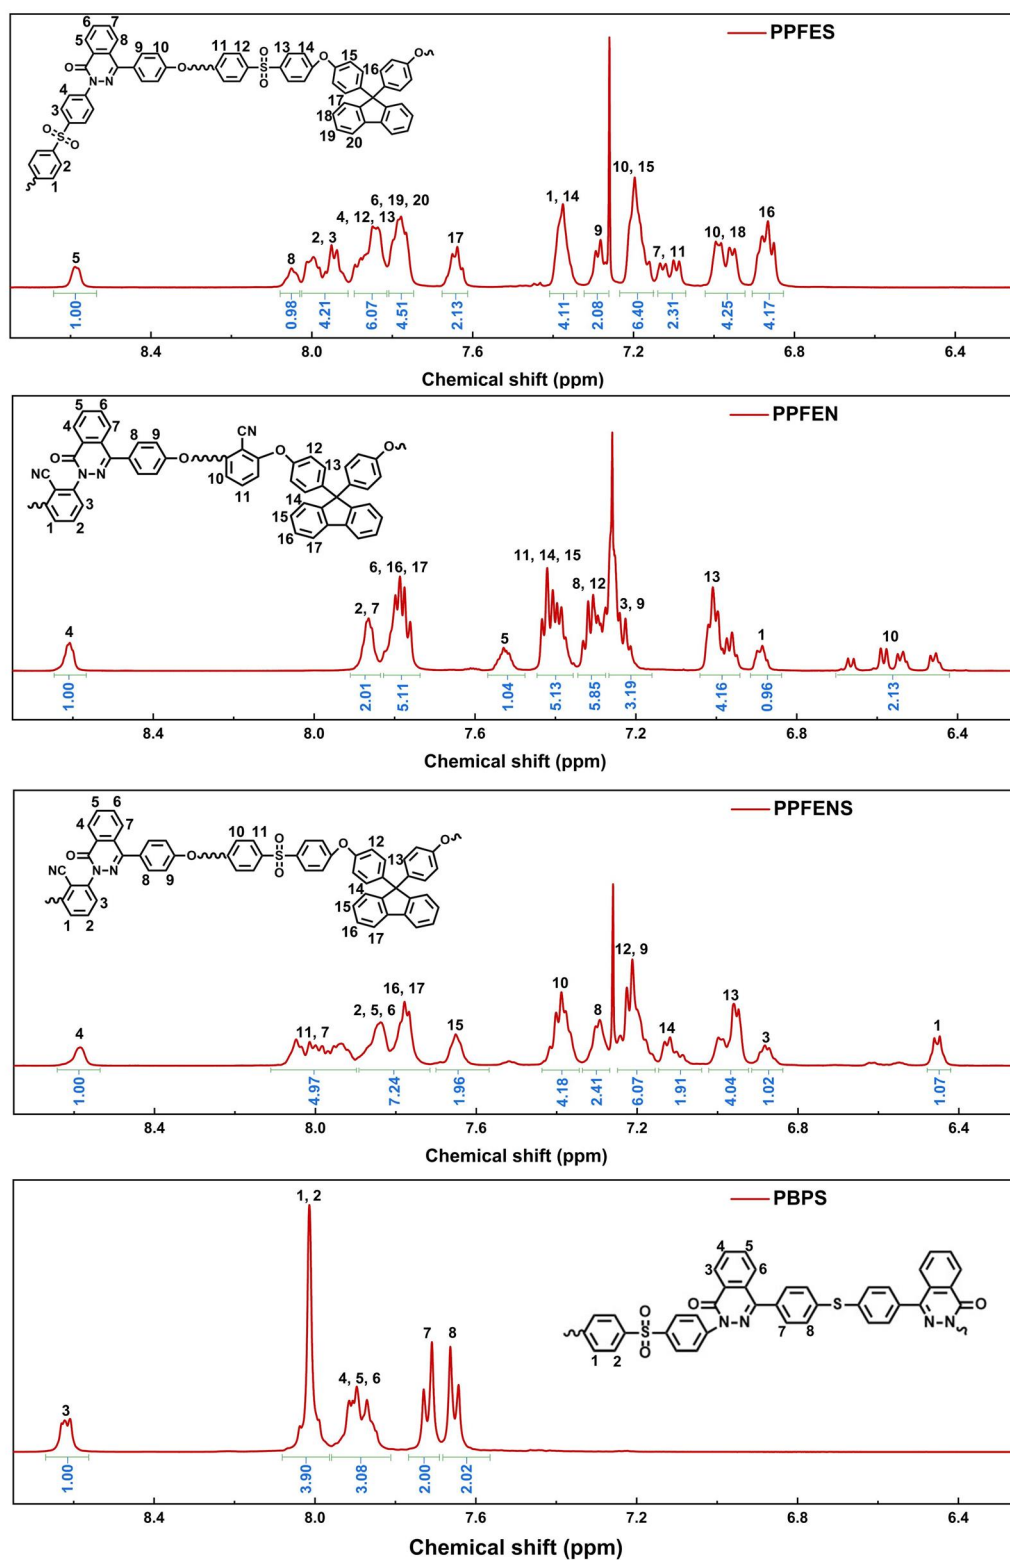

Figure S7.  $^1\text{H}$  NMR spectra of PPFES, PPFEN, PPFENS, and PBPS.

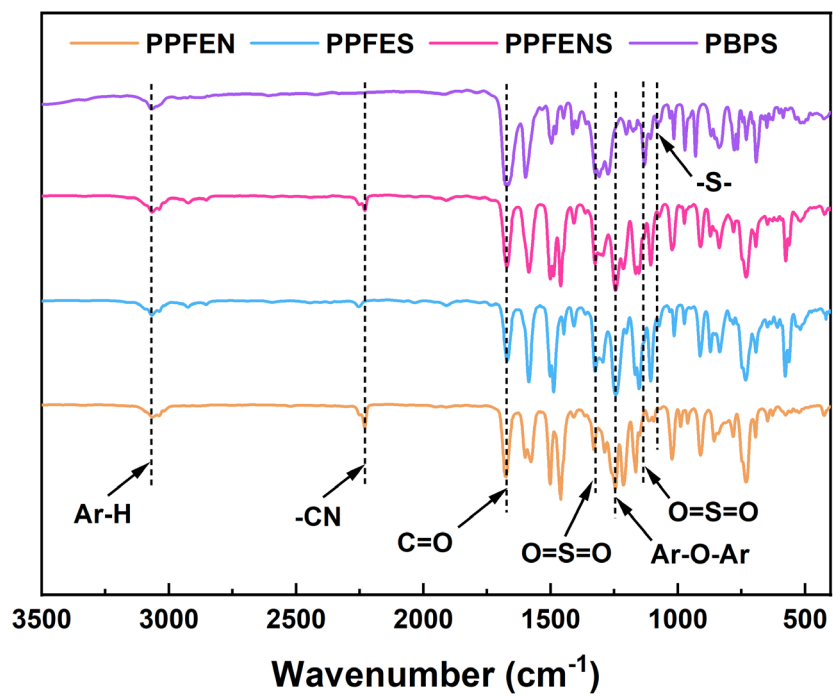

**Figure S8.** Fourier-transform infrared (FT-IR) spectra of PPFES, PPFEN, PPFENS, and PBPS.

## References

- [1] Zhu L, Zong L, Wang C, et al. Effect of di-halogen monomers embraced in main chain of low-dielectric colorless fluorene-based poly (aryl ether) s on their performance. *Polymers for Advanced Technologies*, 2022, 33(6): 1846-1854.
